# Supplementary material
Source: publisher figshare collection journal article supplement (https://asha.figshare.com/articles/dataset/_/21844569)
Supplement: Supplementary file 1 [file 1]

# **Supplemental Material S4. TeleRehab at home engagement survey SurveyMonkey® results.**

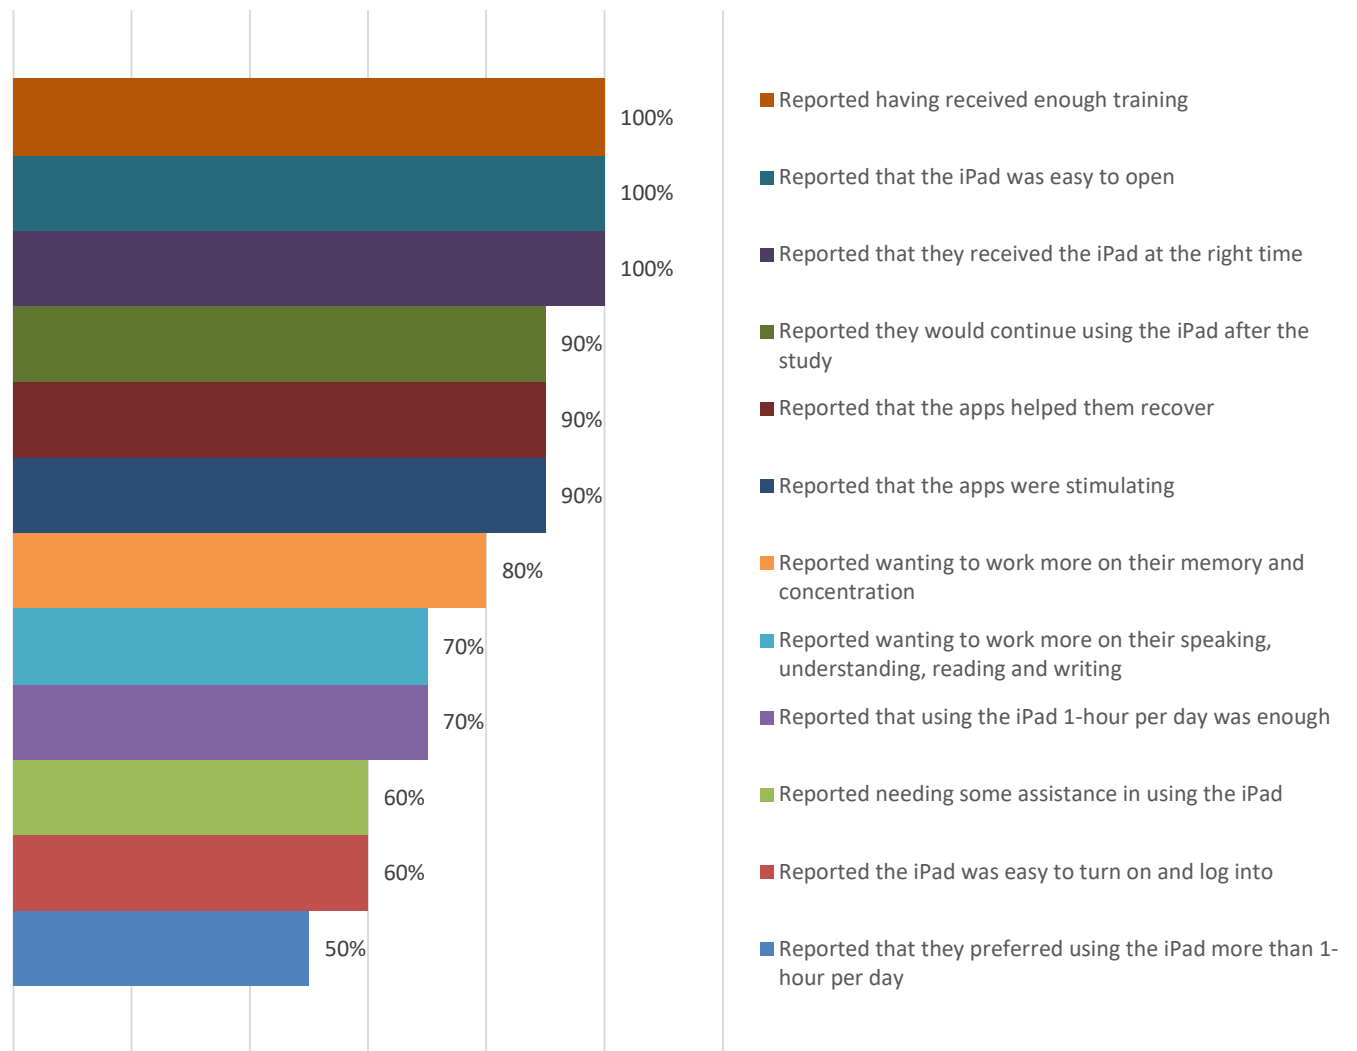

*Note.* The descriptors “somewhat agree” or “strongly agree” were used in this figure.
