# Supplementary material
Source: publisher figshare collection journal article supplement (https://asha.figshare.com/articles/dataset/_/21844569)
Supplement: Supplementary file 2 [file 1]

## Supplemental Material S1. Commercially available applications and their Use

| Applications                                                                                                                  | Target Patient Group                                               |
|-------------------------------------------------------------------------------------------------------------------------------|--------------------------------------------------------------------|
| FaceTime® - Apple Inc. (Cupertino, California, United States)                                                                 | All patients in the treatment arm                                  |
| Constant Therapy (Newton, MA, USA)                                                                                            | Mild to moderate language and/or cognitive-communication deficits. |
| Tactus Therapy Solutions Ltd. (Vancouver, BC, Canada)<br>Language Therapy 4-in-1 Therapy Toolkit                              | More severe language deficits.                                     |
| Tactus Therapy Solutions Ltd. (Vancouver, BC, Canada)<br>Question Therapy 2-in-1: Asking and Answering Questions              | Milder language and/or cognitive-communication deficits.           |
| Tactus Therapy Solutions Ltd. (Vancouver, BC, Canada)<br>Category Therapy                                                     | Milder language and/or cognitive-communication deficits.           |
| Tactus Therapy Solutions Ltd. (Vancouver, BC, Canada)<br>Conversation Therapy Gets People Talking                             | Milder language and/or cognitive-communication deficits.           |
| Lingraphica SmallTalk Oral Motor Exercises (Princeton, NJ, United States)                                                     | Motor speech deficits                                              |
| Multimedia Speech Pathology Speech Sounds on Cue for iPad (Coolangatta, QLD, Australia)                                       | Motor speech deficits                                              |
| Jay Bacal apps (Mahopac, NY, USA) with the modules Search 4 It, Chain Of Thought, Morphos, Get + Together and This Is To That | Milder language and cognitive-communication deficits.              |
