# Supplementary material
Source: publisher figshare collection journal article supplement (https://asha.figshare.com/articles/dataset/_/21844569)
Supplement: Supplementary file 3 [file 1]

**Supplemental Material S5.** Pre- and poststudy poststroke communication deficits severity ratings.

| ID | Arm | AQ Pre<br>BAS<br>Pre | AQ Post<br>BAS<br>Post | LQ Pre<br>BLS<br>Pre | LQ Post<br>BLS<br>Post | BDAE-<br>LCI<br>Pre | BDAE-<br>LCI<br>Post | BNT<br>Pre | BNT<br>Post |
|----|-----|----------------------|------------------------|----------------------|------------------------|---------------------|----------------------|------------|-------------|
| 01 | C   | 91.3*                | 95.9*                  | 92.7*                | 95.9*                  |                     |                      | 59         | 57          |
| 02 | C   | 70                   | 91.6                   | 66.9                 | #                      |                     |                      |            |             |
| 03 | C   | 80                   |                        | 71.25                |                        |                     |                      | 41         |             |
| 04 | C   | 58.5*                | 81.6*                  |                      |                        |                     |                      |            |             |
| 05 | T   | 44.2                 | 70                     | #                    | 66.25                  |                     |                      |            |             |
| 06 | C   | 87.5                 |                        |                      |                        |                     |                      |            |             |
| 07 | C   | 53.3                 | 80.83                  |                      |                        |                     |                      |            |             |
| 08 | T   | #                    | 100                    |                      |                        |                     |                      | 53         | 52          |
| 09 | T   | 91.66                | 95.83                  | 88.75                | 94.38                  |                     |                      |            |             |
| 10 | T   | 80                   | 98.3                   |                      |                        |                     |                      |            |             |
| 11 | T   | 89.16                | 96.66                  | 69.38                | 97.5                   |                     |                      |            |             |
| 12 | C   | 60.8                 |                        |                      |                        |                     |                      |            |             |
| 13 | T   |                      |                        |                      |                        | 36                  | 76                   | 7          | 50          |
| 14 | C   | 83.3                 | 81                     |                      |                        |                     |                      | ^5         | ^2          |
| 15 | C   | @                    |                        |                      |                        |                     |                      |            |             |
| 16 | C   | #                    |                        |                      |                        |                     |                      |            |             |
| 17 | T   | @                    |                        |                      |                        |                     |                      | 42         | 44          |
| 18 | T   | 80                   | 98.3                   | 75                   | 98.75                  |                     |                      |            |             |
| 19 | T   | 75                   | 98.3                   |                      |                        |                     |                      |            |             |
| 20 | T   | 89.16                | 97.5                   |                      |                        |                     |                      | 50         | 55          |

*Note.* C = Control; T = Treatment; \*AQ = Aphasia Quotient; \*LQ = Language Quotient; BAS = Bedside Aphasia Score, BLS = Bedside Language Score; BNT = Boston Naming Test; ^ = BNT Short-Form; BDAE-LCI = Boston Diagnostic Aphasia Examination-Language Competency Index; # = Unable to calculate BAS/BLS (missing subtests); @ = Variety of subtests used from variety of tools.
