# Supplementary material
Source: publisher figshare collection journal article supplement (https://asha.figshare.com/articles/dataset/_/21844569)
Supplement: Supplementary file 4 [file 1]

## Supplemental Material S6. Pre- and poststudy results.

| ID | Treatment/<br>Control | Tests Used<br>(Various subtests –<br>same pre/post) | Raw Score Pre<br>(%) | Raw Score Post<br>(%) |
|----|-----------------------|-----------------------------------------------------|----------------------|-----------------------|
| 8  | Treatment             | WAB-B                                               | 92                   | 94                    |
|    |                       | BDAE-S                                              | 94                   | 100                   |
|    |                       | BNT                                                 | 88                   | 87                    |
| 17 | Treatment             | TT                                                  | 88                   | --                    |
|    |                       | BNT                                                 | 70                   | 73                    |
|    |                       | MT                                                  |                      |                       |
|    |                       | Semantic fluency<br>(Per 2 min 30 sec)              | 34*                  | 38*                   |
|    |                       | Free fluency<br>(Per 2 min 30 sec)                  | 68*                  | 75*                   |
|    |                       | Free fluency<br>(Per 2 min 30 sec)                  | 24*                  | 15*                   |
|    |                       | Semantic judgment                                   | 92                   | 97                    |
| 15 | Control               | @                                                   |                      |                       |
| 16 | Control               | @                                                   |                      |                       |

*Note.* \* Total (not %); WAB-B = Western Aphasia Battery Revised – Bedside Record Form; TT = Token Test; MT = Protocole Montréal-Toulouse d'examen linguistique de l'aphasie MT 86: Module standard initial: M 1 β; BNT = Boston Naming Test; BNT-S = Boston Naming Test Short Form; BDAE-S = Boston Diagnostic Aphasia Evaluation Short Form; @ = Variety of subtests used from variety of tools.
