# Supplementary material
Source: publisher figshare collection journal article supplement (https://asha.figshare.com/articles/dataset/_/21844569)
Supplement: Supplementary file 5 [file 1]

### Supplemental Material S3. Demographics.

#### A. Detailed patient demographics: Stroke details

| ID | Arm       | Age | Sex | Location of stroke                             | Type of Stroke | NIHSS | tPA/EVT   |
|----|-----------|-----|-----|------------------------------------------------|----------------|-------|-----------|
| 01 | Control   | 61  | F   | Left M1 MCA                                    | Ischemic       | 13    | tPA & EVT |
| 02 | Control   | 48  | F   | Left frontal cortical/<br>subcortical infarcts | Ischemic       | 2     |           |
| 03 | Control   | 49  | M   | Left distal MCA branch<br>occlusion            | Ischemic       | 1     |           |
| 04 | Control   | 58  | M   | Left frontal                                   | Hemorrhagic    | 6     |           |
| 05 | Treatment | 74  | F   | Left M2                                        | Ischemic       | 12    |           |
| 06 | Control   | 56  | M   | Bilateral MCA                                  | Ischemic       | 1     |           |
| 07 | Control   | 75  | M   | Left MCA                                       | Ischemic       | 11    | tPA       |
| 08 | Treatment | 69  | F   | Left M3                                        | Ischemic       | 2     | tPA       |
| 09 | Treatment | 69  | M   | Left BG Stroke                                 | Ischemic       | --    |           |
| 10 | Treatment | 86  | F   | Left MCA                                       | Ischemic       | 5     |           |
| 11 | Treatment | 64  | M   | Left M1 & M3                                   | Ischemic       | 18    | EVT       |
| 12 | Control   | 57  | M   | Left M1                                        | Ischemic       | 6     | tPA & EVT |
| 13 | Treatment | 74  | F   | Left M2                                        | Ischemic       | 6     | tPA       |
| 14 | Control   | 72  | M   | Left PCA                                       | Ischemic       | 8     |           |
| 15 | Control   | 63  | F   | Right MCA                                      | Ischemic       | 3     |           |
| 16 | Control   | 45  | M   | Left MCA                                       | Ischemic       | --    |           |
| 17 | Treatment | 31  | F   | Left temporal                                  | Hemorrhagic    | 3     |           |
| 18 | Treatment | 60  | M   | Left MCA                                       | Ischemic       | 8     | tPA       |
| 19 | Treatment | 66  | M   | Left PCA                                       | Ischemic       | 5     | tPA       |
| 20 | Treatment | 80  | F   | Left M2                                        | Ischemic       | 1     |           |

*B. Detailed patient demographics: education, previous technology and start day*

| ID | Arm       | Education            | Computer Knowledge | Previous iPad use | Enrollment Day<br>Post stroke* | Start Day<br>Post stroke* |
|----|-----------|----------------------|--------------------|-------------------|--------------------------------|---------------------------|
| 01 | Control   | High School Graduate | Beginner           | N                 | 5                              | 6                         |
| 02 | Control   | College Graduate     | Average            | Y                 | 5                              | 7                         |
| 03 | Control   | High School          | Average            | Y                 | 2                              | 3                         |
| 04 | Control   | University Graduate  | Advanced           | Y                 | 4                              | 5                         |
| 05 | Treatment | PhD                  | Average            | N                 | 4                              | 5                         |
| 06 | Control   | High School Graduate | Average            | Y                 | 4                              | 7                         |
| 07 | Control   | College Graduate     | Average            | N                 | 4                              | 7                         |
| 08 | Treatment | University Graduate  | Average            | N                 | 3                              | 4                         |
| 09 | Treatment | University Graduate  | Average            | Y                 | 5                              | 5                         |
| 10 | Treatment | University Graduate  | None               | N                 | 5                              | 5                         |
| 11 | Treatment | College Graduate     | Beginner           | Y                 | 3                              | 4                         |
| 12 | Control   | Master's             | Advanced           | Y                 | 4                              | 4                         |
| 13 | Treatment | College Graduate     | Beginner           | Y                 | 6                              | 6                         |
| 14 | Control   | College Graduate     | Average            | Y                 | 3                              | 7                         |
| 15 | Control   | College Graduate     | Average            | Y                 | 10                             | 12                        |
| 16 | Control   | University Graduate  | Advanced           | Y                 | 8                              | 9                         |
| 17 | Treatment | University Graduate  | Advanced           | Y                 | 2                              | 2                         |
| 18 | Treatment | Master's             | Advanced           | Y                 | 2                              | 3                         |
| 19 | Treatment | University Graduate  | Average            | Y                 | 2                              | 2                         |
| 20 | Treatment | High School Graduate | Advanced           | N                 | 3                              | 3                         |

*Note.* \*Admission day = Day 1
