# Supplementary material
Source: publisher figshare collection journal article supplement (https://asha.figshare.com/articles/dataset/_/21844569)
Supplement: Supplementary file 6 [file 1]

## Supplemental Material S2. Therapy materials.

---

### Workbook of Activities for Language and Cognition (WALC) Series

(LinguiSystems Inc. East Moline, IL, United States)

---

|                                                                                        |                                              |
|----------------------------------------------------------------------------------------|----------------------------------------------|
| Kathryn J. Tomlin                                                                      | WALC 1: Aphasia Rehab (2002)                 |
|                                                                                        | WALC 2: Cognitive Rehab (2002)               |
|                                                                                        | WALC 8: Word Finding (2007)                  |
|                                                                                        | WALC 9: Verbal & Visual Reasoning (2007)     |
|                                                                                        | WALC 10: Memory (2006)                       |
|                                                                                        | WALC 11: Language for Home Activities (2007) |
| Linda Bowers, Rosemary Huisingsh,<br>Paul F. Johnson, Carolyn LoGiudice,<br>Jane Orman | WALC 3: Everyday Problem Solving (2003)      |
| Laurie Bounds Keck                                                                     | WALC 4: Everyday Reading (2003)              |
| Lisa Arnold                                                                            | WALC 5: Neuro Rehab (2003)                   |
| Leslie Bilik-Thompson                                                                  | WALC 6: Functional Language (2004)           |

---

### The Source®

(LinguiSystems Inc. East Moline, IL, United States)

---

|                   |                                              |
|-------------------|----------------------------------------------|
| Lisa Arnold       | The Source® for Aphasia Therapy (1999)       |
| Nancy B. Swigert  | The Source® for Dysarthria (1997)            |
| Debra C. Gangale  | The Source® for Oral-Facial Exercises (2001) |
| Kathryn J. Tomlin | The Source® for Apraxia Therapy (1994)       |

---
